# Supplementary material for: MiR-205 and MiR-373 Are Associated with Aggressive Human Mucinous Colorectal Cancer
Source: PubMed Central journal article supplement (PMC4894642; doi:10.1371/journal.pone.0156871), 2016-06-06
Supplement: pone.0156871.s006.pdf [file pone.0156871.s006.pdf]

**S1 Table. List of antibodies.**

| <b>Antibody</b>                                              | <b>Company</b>  | <b>Product no.</b> |
|--------------------------------------------------------------|-----------------|--------------------|
| Anti-AKT (C67E7)                                             | Cell Signaling  | 4691               |
| Anti-phospho-AKT (D9E)                                       | Cell Signaling  | 4060               |
| Anti-asialo GM1                                              | eBioscience     | 16-6507-39         |
| Anti-phospho- $\beta$ -CATENIN (D2F1)                        | Cell Signaling  | 4176               |
| Anti-E-CADHERIN (24E10)                                      | Cell Signaling  | 3195               |
| Anti-N-CADHERIN (32/N)                                       | BD Transduction | 610921             |
| Anti-CCND2 (D52F9)                                           | Cell Signaling  | 3741               |
| Anti-phospho-CDC2                                            | Cell Signaling  | 9111               |
| Anti-CDK2 (78B2)                                             | Cell Signaling  | 2546               |
| Anti-GAPDH (14C10)                                           | Cell Signaling  | 2118               |
| Anti-GAPDH                                                   | Sigma           | G8795              |
| Anti-KLF4                                                    | Cell Signaling  | 4038               |
| Anti-MUC2                                                    | LS Bio          | LS-B11708          |
| Anti-PCNA (D3H8P)                                            | Cell Signaling  | 13110              |
| Anti-PKC $\epsilon$ (22B10)                                  | Cell Signaling  | 2683               |
| Anti-phospho-RB                                              | Cell Signaling  | 9301               |
| Anti-STAT3 (124H6)                                           | Cell Signaling  | 9139               |
| Anti-phospho-STAT3 (D3A7)                                    | Cell Signaling  | 9145               |
| Anti-ZO-1                                                    | Thermo Fisher   | 61-7300            |
| Anti- $\beta$ -TUBULIN-AlexaFluor® 647 (9F3)                 | Cell Signaling  | 3624               |
| Anti-phospho-HISTONE H3-PacificBlue® (D2C8)                  | Cell Signaling  | 8552               |
| AlexaFluor® 647-conjugated goat-anti-rabbit                  | Thermo Fisher   | A-21245            |
| ECL™ Anti-rabbit IgG HRP linked F(ab') <sub>2</sub> fragment | GE Healthcare   | NA9340V            |
| ECL™ Anti-mouse IgG HRP linked whole antibody                | GE Healthcare   | NA931V             |
| Phalloidin AlexaFluor® 647                                   | Thermo Fisher   | A-22287            |
