# Supplementary material for: MiR-205 and MiR-373 Are Associated with Aggressive Human Mucinous Colorectal Cancer
Source: PubMed Central journal article supplement (PMC4894642; doi:10.1371/journal.pone.0156871), 2016-06-06
Supplement: pone.0156871.s007.pdf [file pone.0156871.s007.pdf]

**S2 Table. Conditions of immunofluorescent staining.**

| <b>antibody</b>                                                                                      | <b>fixation</b>                   | <b>block</b>               | <b>dilution</b> | <b>antibody diluent</b>       |
|------------------------------------------------------------------------------------------------------|-----------------------------------|----------------------------|-----------------|-------------------------------|
| MUC2                                                                                                 | 4% PFA/H <sub>2</sub> O; 10min RT | PBS + 1% NGS               | 1:50            | PBS                           |
| ZO-1                                                                                                 | 100% acetone; 1min -20°C          | PBS + 1% NGS               | 1:50            | PBS                           |
| phospho-HISTONE H3-<br>PacificBlue®<br>+<br>β-TUBULIN-<br>AlexaFluor® 647<br>or<br>phospho-β-CATENIN | 4% PFA/H <sub>2</sub> O; 15min RT | PBS + 1% BSA + 0.3% TX-100 | 1:50            | PBS + 1% BSA<br>+ 0.3% TX-100 |

[BSA: bovine serum albumin; NGS: normal goat serum; PFA: paraformaldehyde; RT: room temperature; TX-100: Triton X-100]
